# Supplementary material for: Evaluation of PD-L1 and other immune markers in bladder urothelial carcinoma stratified by histologic variants and molecular subtypes
Source: PubMed Central journal article supplement (PMC6989654; doi:10.1038/s41598-020-58351-6), 2020-01-29
Supplement: 41598_2020_58351_MOESM1_ESM.pdf [file 41598_2020_58351_MOESM1_ESM.pdf]

**Evaluation of PD-L1 and other immune markers in bladder urothelial carcinoma stratified by histologic variants and molecular subtypes**

Huili Li<sup>1</sup>, Qingzhao Zhang<sup>1</sup>, Lauren Shuman<sup>2</sup>, Matthew Kaag<sup>3</sup>, Jay D. Raman<sup>3</sup>, Suzanne Merrill<sup>3</sup>  
David J. DeGraff<sup>1,2,3</sup>, Joshua I. Warrick<sup>1,3#</sup>, Guoli Chen<sup>1,4#</sup>.

<sup>1</sup>Department of Pathology, Penn State College of Medicine, Hershey, PA; <sup>2</sup>Department of Biochemistry and Molecular Biology, Penn State College of Medicine, Hershey, PA;

<sup>3</sup>Department of Surgery, Penn State College of Medicine, Hershey, PA. <sup>4</sup>Department of Laboratory Medicine, Geisinger Medical Center, Danville, PA. #co-corresponding authors

**#Co-corresponding Authors**

Joshua I. Warrick, MD  
Department of Pathology  
Milton S. Hershey Medical Center  
Penn State College of Medicine  
500 University Drive  
Hershey, PA 17033  
email: [jwarrick@pennstatehealth.psu.edu](mailto:jwarrick@pennstatehealth.psu.edu)

Guoli Chen, MD, PHD  
Department of Laboratory Medicine  
Geisinger Medical Center  
100 N Acedemy Aveune  
Danville, PA 17822  
email: [gchen1@geisinger.edu](mailto:gchen1@geisinger.edu)

**Supplementary Table. S1.** Summary of histologic variants and molecular subtypes in this study.

|                      |    |
|----------------------|----|
| CIS                  | 77 |
| NIPUC                | 40 |
| UC, convention       | 52 |
| UC, glandular        | 15 |
| UC, micropapillary   | 14 |
| UC, scc              | 39 |
| UC, sarcomatoid      | 12 |
| UC, nested           | 4  |
| UC, plasmacytoid     | 4  |
| UC, small cell       | 3  |
|                      |    |
| Basal-squamous       | 36 |
| Urothelial-like      | 55 |
| Genomically-unstable | 27 |
| mesenchymal          | 3  |
| nontype              | 7  |

**Supplementary Table. S2.** Summary of scoring system for each marker by H&E and IHC stains.

| <i>Immune Markers</i> | <i>IHC target</i>         | <i>Function</i>      | <i>Scoring System</i> |                 |                                          |                   |
|-----------------------|---------------------------|----------------------|-----------------------|-----------------|------------------------------------------|-------------------|
|                       |                           |                      | <i>0</i>              | <i>1</i>        | <i>2</i>                                 | <i>3</i>          |
| <b>HE</b>             | lymphocytes               | Chronic inflammation |                       | <10% area       | 10-49% area                              | ≥50% area         |
| <b>CD3</b>            | T cell                    | Immune response      | no stain              | <50% area, weak | <50% area, strong or ≥50% area, moderate | ≥50% area, strong |
| <b>CD8</b>            | Cytotoxic T cell          | Immune response      | no stain              | <50% area, weak | <50% area, strong or ≥50% area, moderate | ≥50% area, strong |
| <b>CD68</b>           | Macrophage/monocytes      | Immune suppression   | no stain              | <50% area, weak | <50% area, strong or ≥50% area, moderate | ≥50% area, strong |
| <b>PD1</b>            | Predominantly Lymphocytes | Immune suppression   | no stain              | <5% area        | 5-49% area                               | ≥50% area         |
| <b>PDL1</b>           | Predominantly Tumor cells | Immune suppression   | no stain              | <5% area        | 5-49% area                               | ≥50% area         |

**Supplementary Figure. S1.** Representative H&E and immunohistochemically (IHC) stained sections for various markers. (A-F: 100x). The sections were evaluated by criteria described in Supplementary Table S2. A. H&E stain, score=1 for chronic inflammation; B. IHC stain, score=2 for CD3; C. IHC stain, score=2 for CD8; D. IHC stain, score=0 for CD68; E. IHC stain, score=1 for PD1; F. IHC stain, score=3 for PD-L1.

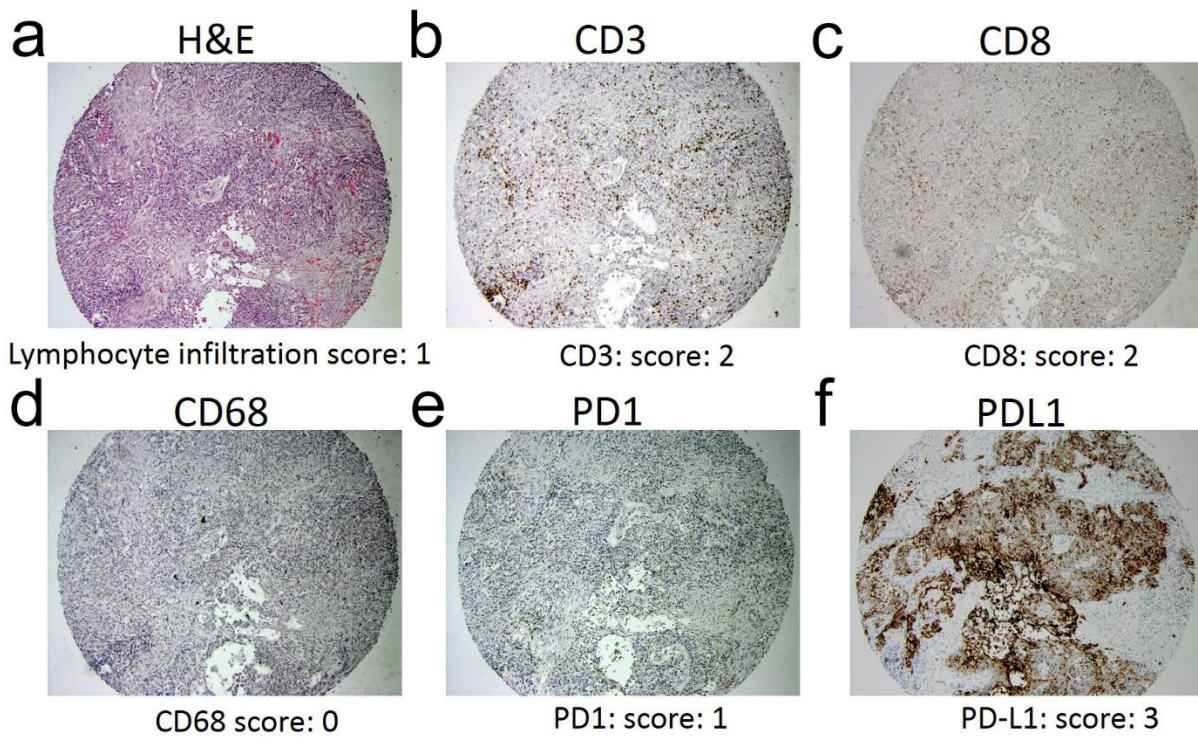

**Supplementary Figure. S2.** Immune high and immune low clusters in invasive UC by unsupervised hierarchical cluster. The same method from Figure 2 is applied to only invasive UC specimens. A similar immune high and immune low clustering pattern is identified.

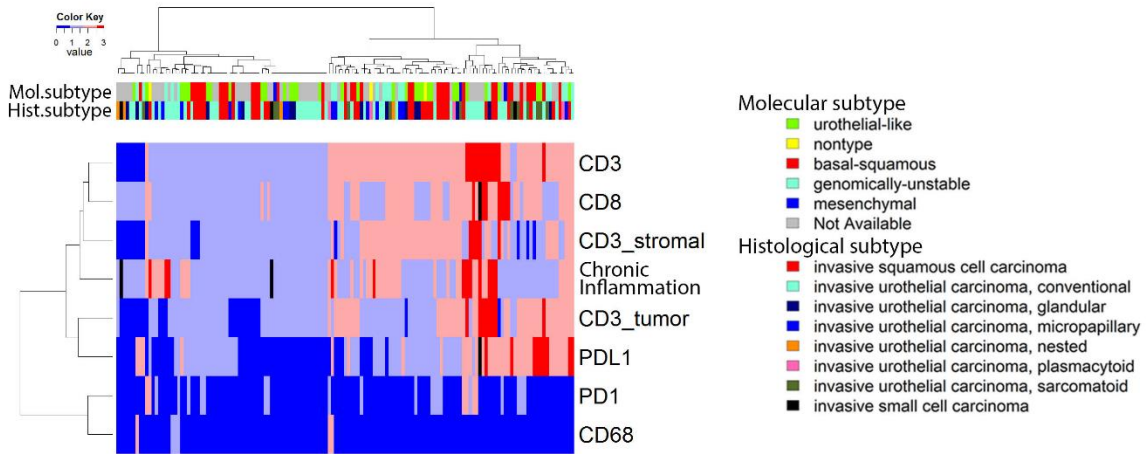

**Supplementary Figure. S3.** Distribution of histologic variants of invasive UC in immune high and immune low clusters. The molecular subtypes and histology subtypes in the cluster dendrogram from spl. Fig. 1 are analyzed and compared. Within the invasive UC variants, sarcomatoid and squamous histologies show more case numbers in the immune high cluster, as compared to the other variants, but without statistical significance.

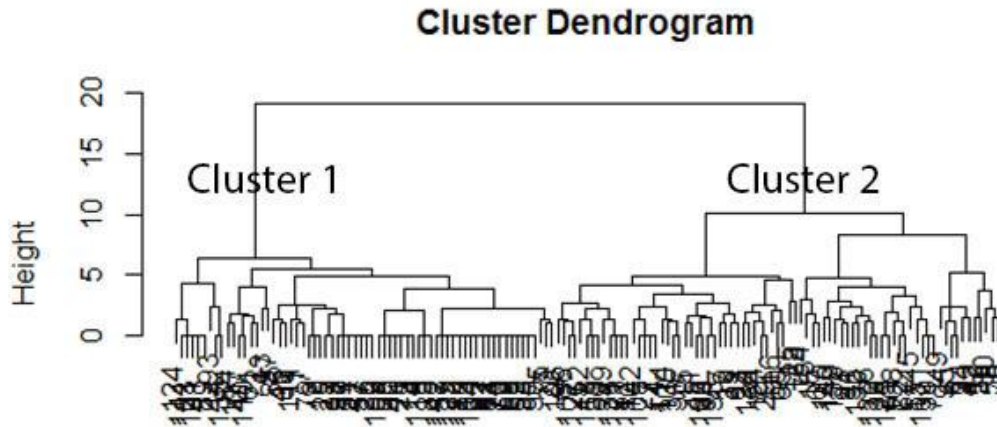

|                           | <b>cluster1-66 specimen</b> |    | <b>cluster2-77-specimen</b> |    |
|---------------------------|-----------------------------|----|-----------------------------|----|
| <b>Molecular subtypes</b> | urothelial-like             | 15 | urothelial-like             | 17 |
|                           | basal-squamous              | 15 | basal-squamous              | 21 |
|                           | nontype                     | 1  | nontype                     | 2  |
|                           | genomically-unstable        | 5  | genomically-unstable        | 14 |
|                           | mesenchymal                 | 1  | mesenchymal                 | 2  |
| <b>Histology subtypes</b> | convention                  | 28 | convention                  | 24 |
|                           | SCC                         | 16 | SCC                         | 23 |
|                           | glandular                   | 7  | glandular                   | 8  |
|                           | micropapillary              | 7  | micropapillary              | 7  |
|                           | sarcomatoid                 | 3  | sarcomatoid                 | 9  |
|                           | nested                      | 3  | nested                      | 1  |
|                           |                             |    | plasmacytoid                | 4  |
|                           | smallcell                   | 2  | smallcell                   | 1  |
